# Supplementary material
Source: PubMed Central journal article supplement (PMC3220586)

### Figure legends for supplementary figures

**Figure S1.**  $\text{Ca}^{2+}$  is not required for the depolarization-induced enhancement of KCNQ2/Q3 current and activation of PKC  $\beta$ II

(A) Summary data shows that the treatments that either did not contain extracellular  $\text{Ca}^{2+}$  [EGTA (EGTA 100  $\mu\text{M}$  +  $\text{Ca}^{2+}$  free),  $\text{Cd}^{2+}$  ( $\text{Cd}^{2+}$  200  $\mu\text{M}$  +  $\text{Ca}^{2+}$  free)] or affected intracellular  $\text{Ca}^{2+}$  [ionomycin (1  $\mu\text{M}$ ), thapsigargin (2  $\mu\text{M}$ ), and BAPTA-AM (100  $\mu\text{M}$ )] did not affect the depolarization-induced increase of KCNQ2/Q3 currents.

(B) The depolarization did not induce an increase of intracellular  $\text{Ca}^{2+}$  levels. The oocytes were injected with  $\text{Ca}^{2+}$ -green-1-dextran (23 nl of 2 mM to obtain a final concentration of 60  $\mu\text{M}$ ), a  $\text{Ca}^{2+}$  fluorescence indicator, and monitored using a confocal microscope (Leica SP2). The right panel shows the time course of the  $\text{Ca}^{2+}$  signal. Clearly the depolarization (ND96-K) did not cause an increase in intracellular  $\text{Ca}^{2+}$ , whereas ionomycin (1  $\mu\text{M}$ ) did.

(C) The absence of extracellular  $\text{Ca}^{2+}$  did not affect the depolarization- or PMA-induced increase of membrane PKC  $\beta$ II (the left panel) or PKC  $\alpha$  (the right panel).

**Figure S2.** DAG has no effect on the KCNQ2/Q3 current

(A) Treatment of oocytes with either OAG (10  $\mu\text{M}$ , an analogue of DAG) or m-3M3FBS (20  $\mu\text{M}$ , an activator of PLC) did not affect the KCNQ2/Q3 currents in *Xenopus* oocytes.

(B) Genistein (20  $\mu\text{M}$ ), a non-specific blocker of receptor tyrosine kinases, did not inhibit the depolarization-induced potentiation of KCNQ2/Q3.

Fig.S1

A

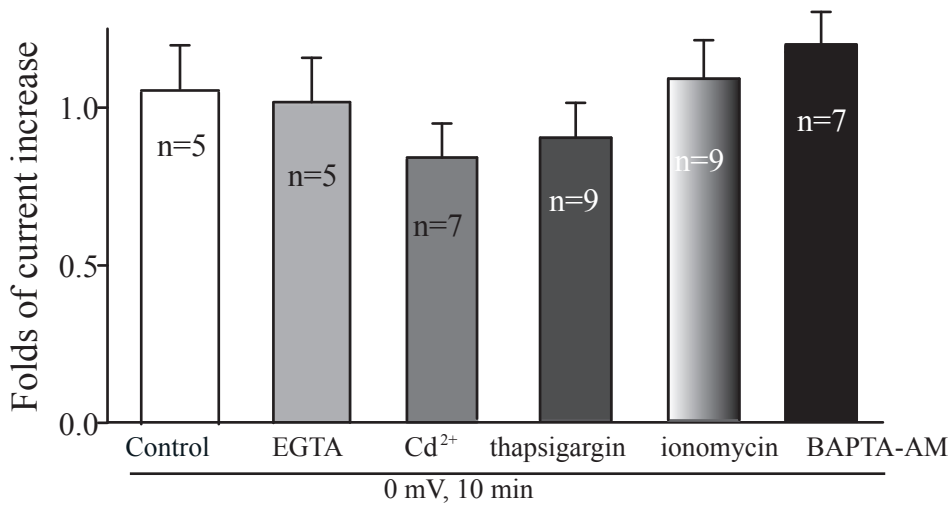

B

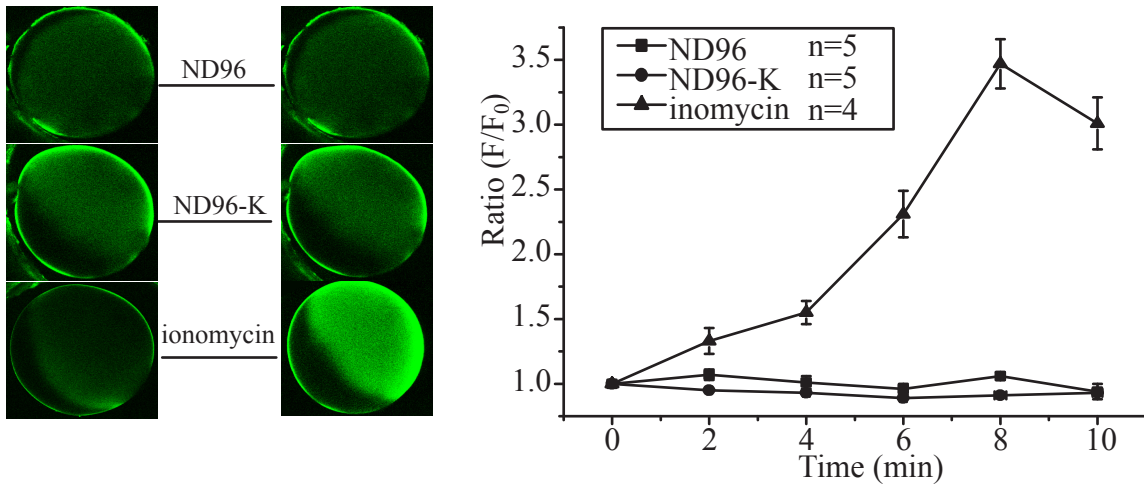

C

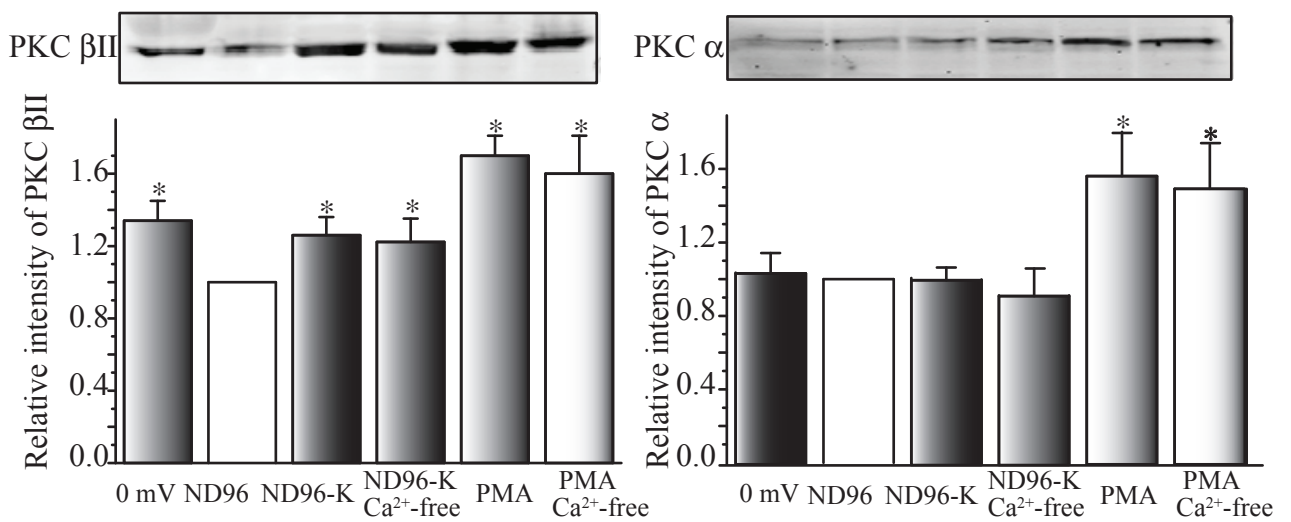

Fig.S2

A

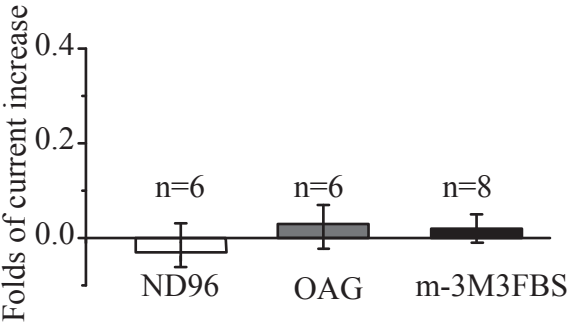

B

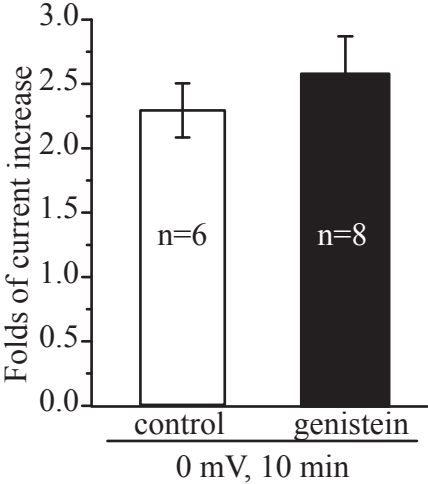

Supplement: supp_M111.289090_jbc.M111.289090-1.pdf [file supp_M111.289090_jbc.M111.289090-1.pdf]
